# Supplementary material for: Highly dispersed magnetic molecularly imprinted nanoparticles with well-defined thin film for the selective extraction of glycoprotein
Source: Royal Society of Chemistry journal article supplement (doi:10.1039/c6tb00409a), 2016-01-01
Supplement: c6tb00409a1.pdf [file c6tb00409a1.pdf]

## Supporting Information

Highly dispersed magnetic molecularly imprinted nanoparticles with well-defined thin film for the selective extraction of glycoprotein

*Run-tian Ma,<sup>a, b</sup> Wei Ha,<sup>a</sup> Juan Chen,<sup>a</sup> Yan-ping Shi<sup>a \*</sup>*

<sup>a</sup> Key Laboratory of Chemistry of Northwestern Plant Resources and Key Laboratory for Natural Medicine of Gansu Province, Lanzhou Institute of Chemical Physics, Chinese Academy of Sciences, Lanzhou 730000, P. R. China.

<sup>b</sup> University of Chinese Academy of Sciences, Beijing 100049, P. R. China.

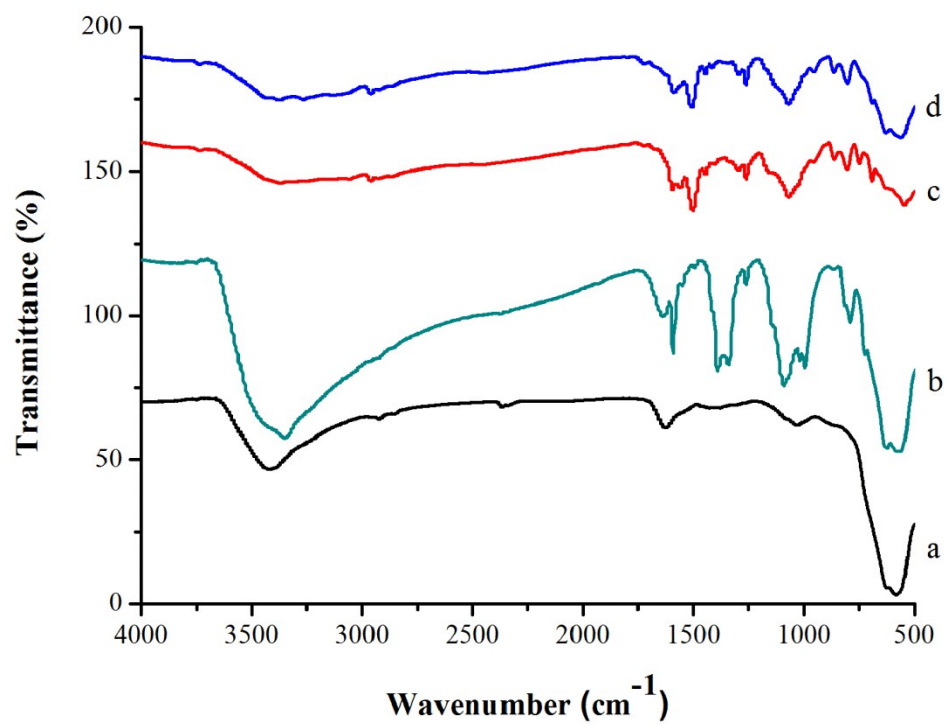

**Fig.S1.** FT-IR spectra of the  $\text{Fe}_3\text{O}_4$  NPs (a), boronate-functionalized  $\text{Fe}_3\text{O}_4$  NPs (b), MMIPs (c), MNIPs (d).

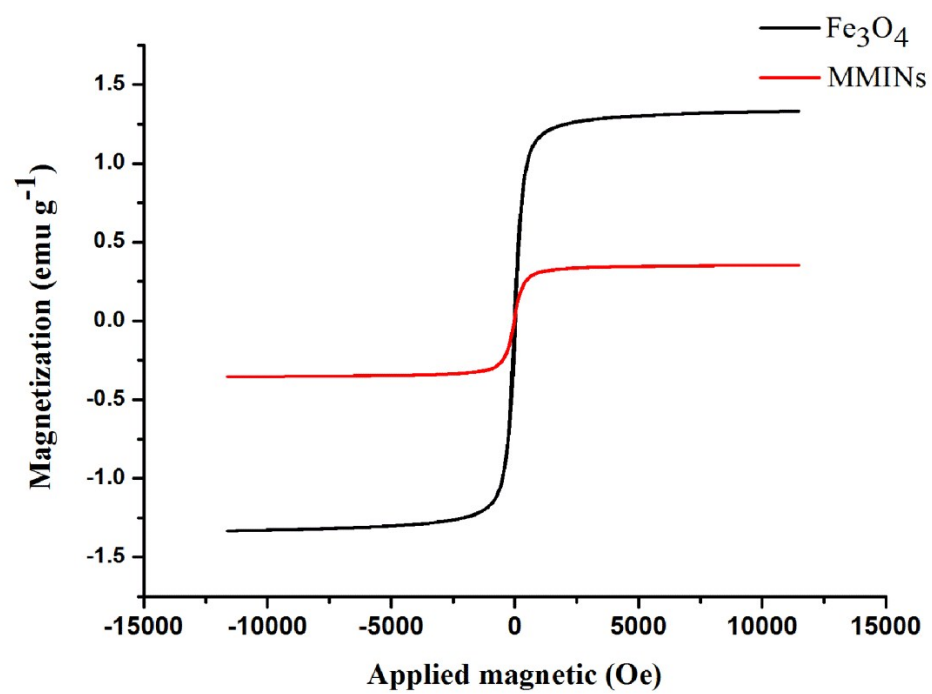

**Fig.S2.** Hysteresis loops of Fe<sub>3</sub>O<sub>4</sub> NPs and MMIPs

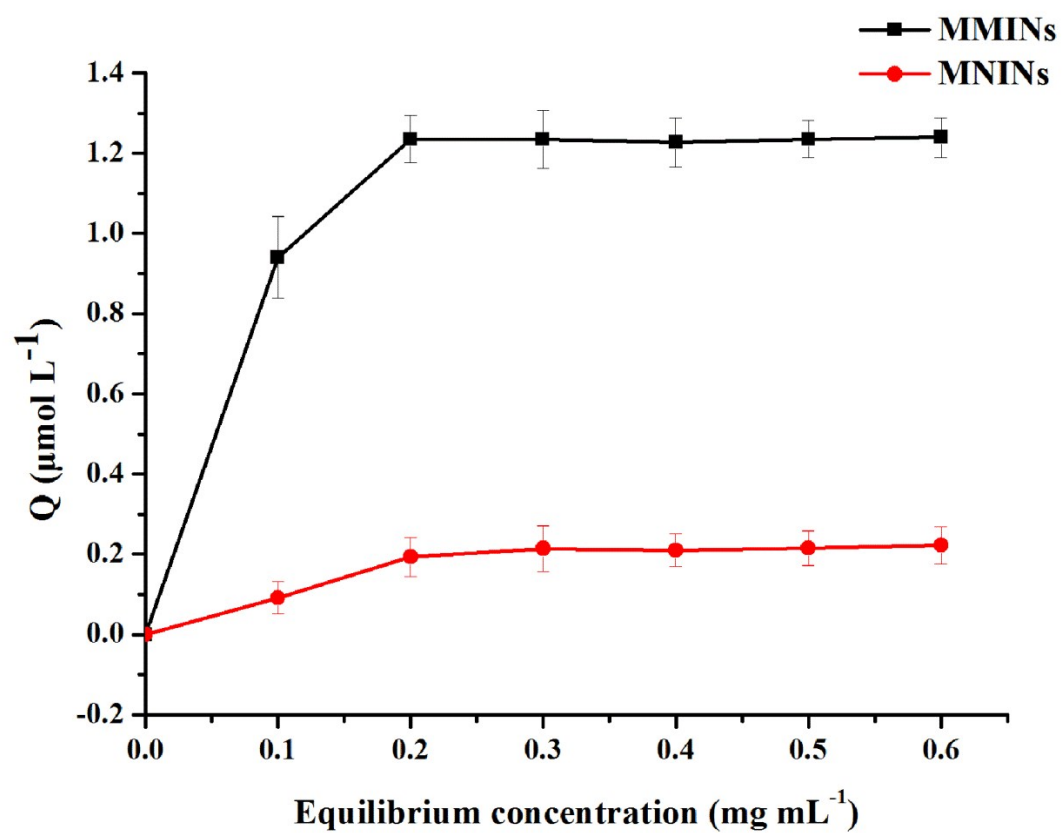

**Fig.S3.** The adsorption isotherms of HRP on the MMIPs and MNIPs.

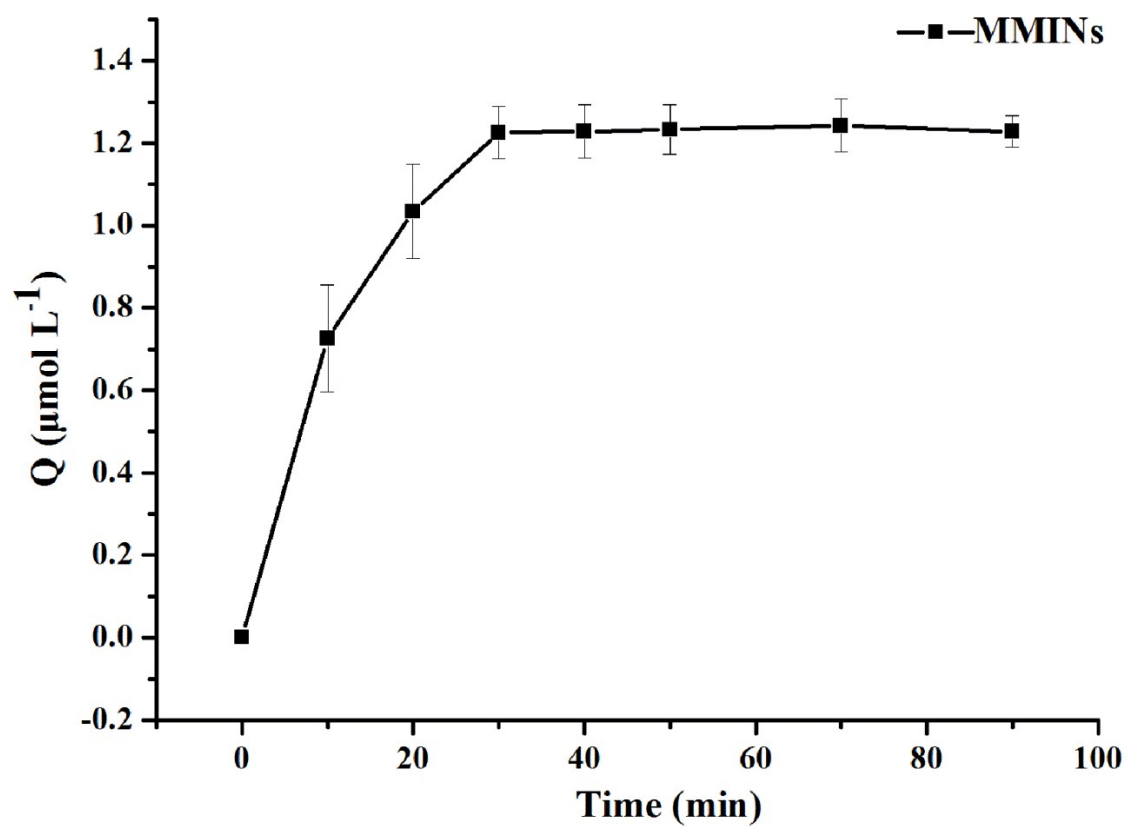

**Fig.S4.** Effect of extraction time.

Table S1 Average particle size and distributions of the particles

| Particles                                                      | Average particle size (nm) | RSD <sup>a</sup> (%) | PDI   | RSD <sup>b</sup> (%) |
|----------------------------------------------------------------|----------------------------|----------------------|-------|----------------------|
| Fe <sub>3</sub> O <sub>4</sub>                                 | 358.6                      | 6.81                 | 0.172 | 5.99                 |
| Fe <sub>3</sub> O <sub>4</sub> @Au                             | 359.17                     | 7.47                 | 0.191 | 7.90                 |
| Boronic acid functionalized Fe <sub>3</sub> O <sub>4</sub> @Au | 359.76                     | 6.02                 | 0.196 | 4.03                 |
| MMINs                                                          | 379.01                     | 12.41                | 0.229 | 8.83                 |
| MNINs                                                          | 392.57                     | 15.92                | 0.241 | 10.52                |

a: the average particle size of the particles; b: PDI of the particles
